# Supplementary material for: Novel Chemicals Derived from Tadalafil Exhibit PRMT5 Inhibition and Promising Activities against Breast Cancer
Source: Int J Mol Sci. 2022 Apr 27;23(9):4806. doi: 10.3390/ijms23094806 (PMC9103191; doi:10.3390/ijms23094806)
Supplement: Supplementary file 1 [file ijms-23-04806-s001.zip › ijms-1624470-supplementary.pdf]

**A**

**B**

**C**

**Chemical B**

**SAM binding site**

**ARG binding site**

**Allosteric site**

**Legend:**

- polar (pink circle)
- acidic (red circle)
- basic (blue circle)
- greasy (green circle)
- proximity contour (dashed line)
- sidechain acceptor (green arrow)
- sidechain donor (red arrow)
- backbone acceptor (blue arrow)
- backbone donor (red arrow)
- ligand exposure (blue circle)
- solvent residue (white circle)
- metal complex (grey circle)
- solvent contact (dashed line)
- metal contact (dotted line)
- receptor contact (blue circle)
- arene-arene (green circle)
- arene-cation (green circle)

1

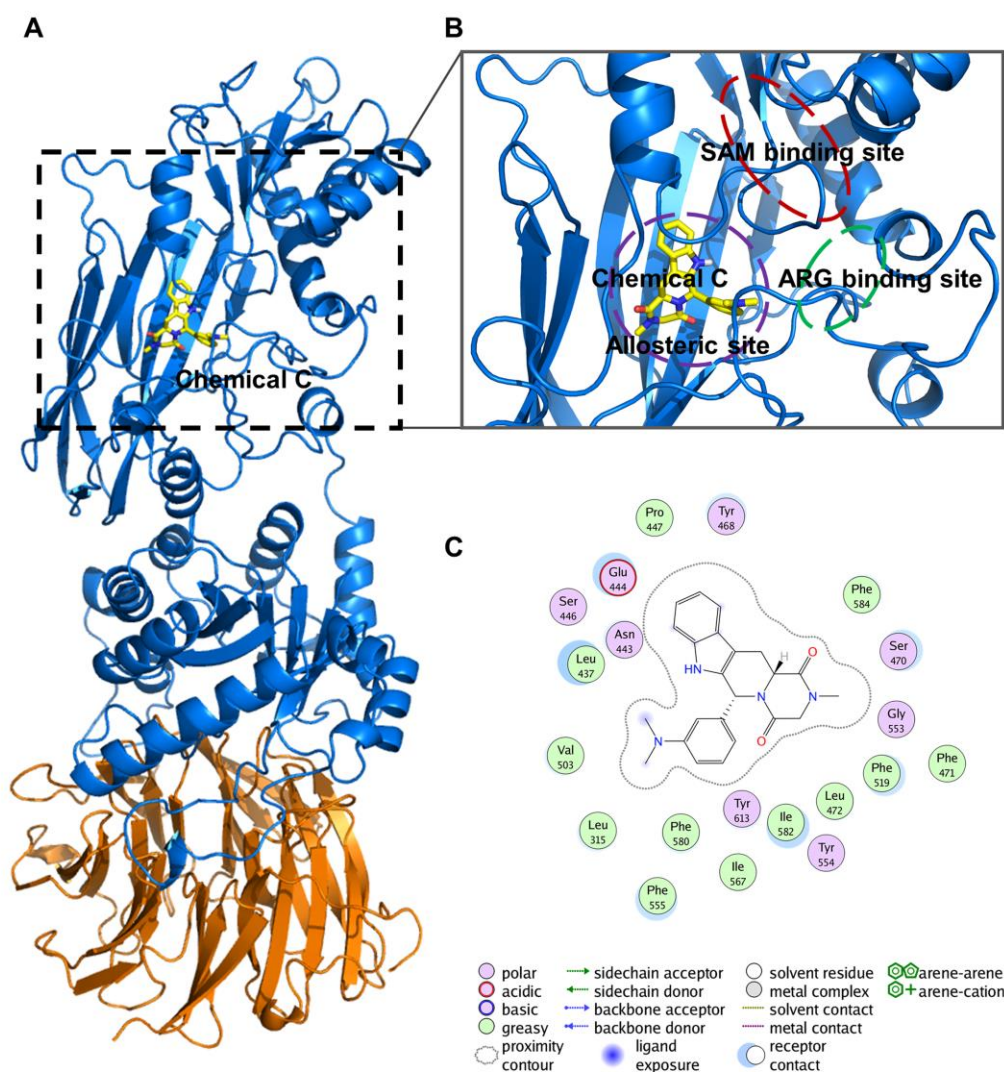

**Figure S2.** Binding interactions of chemical C with human PRMT5. **(A)** Overall structure of PRMT5:MEP50 complexed with chemical C at an allosteric site. PRMT5 is shown as a blue ribbon, MEP50 is shown as an orange ribbon, and chemical C is shown as yellow sticks. **(B,C)** Detailed binding interactions of chemical C with human PRMT5.

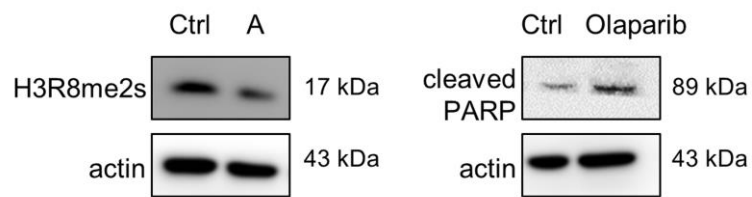

**Figure S3.** Target validation markers were detected in subcutaneous xenograft tumor models. Tumor tissues in Figure 12 were subjected to western blotting with anti-H3R8me2s and anti-cleaved PARP antibodies.
